# Supplementary material
Source: PubMed Central journal article supplement (PMC2644139)
Supplement: 0808909106_0808909106SI.pdf [file 0808909106_0808909106SI.pdf]

# Supporting Information

Bauer et al. 10.1073/pnas.0808909106

## SI Materials and Methods

**Induction of Transfer EAE.** Transfer EAE was induced by transferring  $2 \times 10^6$  encephalitogenic T cells intravenously into WT sex-matched C57BL/6 mice irradiated with 3.5 Gy. To obtain encephalitogenic T cells, spleen and axillary, inguinal, brachial, and paraaortal lymph nodes were isolated from  $\beta_1^{fl/fl}/2D2^+/MxCre^+$  mice that had received a single intraperitoneal injection of 250  $\mu\text{g}$  of poly(IC) (Amersham Biosciences) in PBS. Single-cell suspensions were obtained, and after ACK lysis of red blood cells (1), cells from 2 mice were cocultured with  $4 \times 10^6$  DCs loaded for 2 h with 20  $\mu\text{g}/\text{mL}$  MOG<sub>35–55</sub> peptide (Biotrend). After 4 days of coculture, the cell suspensions were split 1:2 into medium containing 5 ng/mL IL-2 (R&D Systems). After another 7 days of culture, dead cells were removed by Nycoprep 1.077 A (Axis-Shield) density gradient centrifugation. For depletion of  $\beta_1$ -positive T cells, the cell suspension was subsequently incubated with a biotinylated  $\beta_1$ -integrin antibody, followed by streptavidin-microbead separation according to the manufacturer's protocol (Miltenyi Biotec). A total of  $2 \times 10^6$  cells per well were incubated overnight in 24-well plates coated with 1  $\mu\text{g}/\text{mL}$  anti-mouse CD3e and CD28 antibodies and in the presence of recombinant murine IL-18 (20 ng/mL; MBL), IL-12 (25 ng/mL), and IL-23 (10 ng/mL; both from R&D Systems). The cells were subsequently washed 3 times with PBS and transferred intravenously into recipient mice irradiated with 3.5 Gy. Clinical disease score and weight of animals with active and transfer EAE were checked daily, and scoring of the mice was as follows: 0, healthy; 1, limp tail; 2, hind leg weakness; 3, one paralyzed hind leg; 4, both hind legs paralyzed; and 5, moribund or dead. Mice scored 1 to 2 were used as recipients for IVM experiments.

**Cell Culture.** Activated T cells for adhesion assays and IVM experiments were generated in vitro from  $\beta_1^{fl/fl}/OT-II.2^+/MxCre^+$  mice. Mice received a single intraperitoneal injection of 250  $\mu\text{g}$  of poly(IC) in PBS. At 6 to 8 weeks after knockout induction, mice were killed, and single-cell suspensions of splenocytes were obtained. After ACK lysis, splenocytes from 1 mouse were cocultured with  $4 \times 10^6$  DCs loaded for 2 h with 20  $\mu\text{g}/\text{mL}$  OVA<sub>323–339</sub> peptide (in-house peptide synthesis service). After 4 days of coculture, the cell suspensions were split 1:2 into fresh medium containing 5 ng/mL IL-2 (R&D Systems). After another 2 days of coculture, dead cells were removed by density

gradient centrifugation, and  $\beta_1$ -positive T cells were depleted as described above. The efficiency of sorting was monitored by staining with fluorochrome-labeled CD4 and  $\beta_1$  antibodies and subsequent FACS analysis. On average, 90.4% of the cells were CD4<sup>+</sup> and 92.2% of the  $\beta_1$ -depleted cells were  $\beta_1$ -negative.

**IVM.** IVM images were captured by using a custom-made Mikron IVM500 fluorescence microscope connected to an SIT camera (Dage-MTI). Epiillumination techniques were used to visualize the spinal cord microvasculature after injection of 0.1 mL of 1% TRITC-conjugated dextran ( $M_r = 155,000$ ; Sigma-Aldrich). Real-time observations were made by using  $\times 4$ ,  $\times 10$ , and  $\times 20$  long-distance working objectives, and microscopic images were recorded by using a DSR-11 digital videocassette recorder (Sony) for later offline analysis, which was performed exactly as described previously (2, 3).  $\beta_1^{-/-}$  and control CD4<sup>+</sup> T cells, isolated as described above, were fluorescently labeled with 125 nM Calcein-AM (Molecular Probes) before their infusion via the right carotid artery. For direct comparison of the interaction of  $\beta_1^{-/-}$  and control T cells within the same spinal cord white matter vascular bed, injection of  $\beta_1^{-/-}$  T cells was followed by injection of control T cells (each  $4 \times 10^6$  cells in 300  $\mu\text{L}$  of 0.9% NaCl injected in aliquots of 100  $\mu\text{L}$ ) into the same mouse 1 h later. This experimental setup might produce artefacts because of the extended observation time. Thus, the interaction of  $\beta_1^{-/-}$  and control CD4<sup>+</sup> T cells was additionally compared in individual mice injected with 1 T cell population only. The same results were obtained using both experimental approaches.

T cells passing through spinal cord microvessels (20–60  $\mu\text{m}$ ) and T cells, which visibly initiated contact with the spinal cord microvascular endothelium and thus moved at a slower velocity than the main bloodstream, were counted during an observation period of 1 min in frame-by-frame analysis of the videos using the CapImage software (version 8.3) (2). The fraction of T cells initiating contact with the vascular wall was calculated for each microvessel as the percentage of interacting T cells among the total number of T cells passing through a given postcapillary venule during this 1-min observation window. The rolling fractions and the capture fractions were counted accordingly. Permanently adherent T cells were identified as cells stuck to the vessel wall without moving or detaching from the endothelium within an observation period of  $\geq 20$  sec and were counted 10, 30, and 60 min after T cell infusion.

1. Bungartz G, et al. (2006) Adult murine hematopoiesis can proceed without  $\beta_1$  and  $\beta_2$  integrins. *Blood* 108:1857–1864.
2. Vajkoczy P, Laschinger M, Engelhardt B (2001)  $\alpha 4$ -integrin-VCAM-1 binding mediates G protein-independent capture of encephalitogenic T cell blasts to CNS white matter microvessels. *J Clin Invest* 108:557–565.

3. Stein JV, et al. (1999) L-selectin-mediated leukocyte adhesion in vivo: Microvillous distribution determines tethering efficiency, but no rolling velocity. *J Exp Med* 189:37–50.

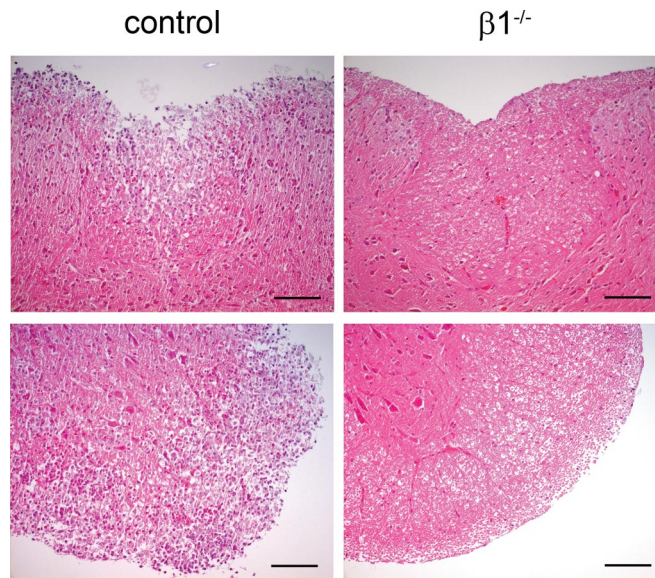

**Fig. S1.**  $\beta_1$ -Deficient T lymphocytes are not encephalitogenic. Shown are H&E-stained cross-sections of the dorsal part (*Upper*) or the ventral white matter (*Lower*) of the spinal cord of WT mice that received control or  $\beta_1^{-/-}$ , MOG<sub>35-55</sub>-specific T cell blasts. (Scale bars, 100  $\mu\text{m}$ .)

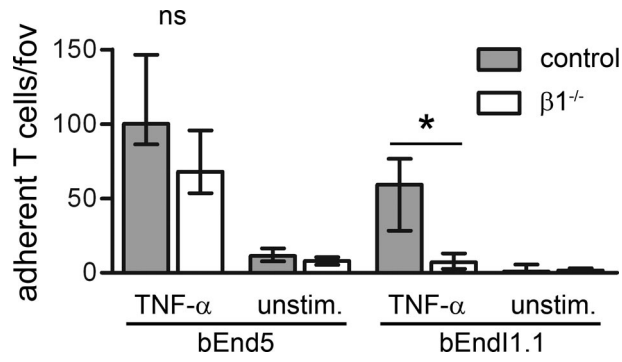

**Fig. S2.** Static adhesion of T cells to endothelioma cell lines is mainly integrin  $\alpha_L\beta_2$ -dependent. Adhesion of T cell blasts to the endothelioma cell lines bEnd5 (WT) and bEnd11.1 (ICAM-1<sup>-/-</sup>) was analyzed. Endothelioma cells were stimulated with TNF- $\alpha$  before the assay, which was performed at 4 °C to reduce the contribution of the interaction between LFA-1 and ICAM-1. Graphs show medians and interquartile ranges ( $n = 4$ ).

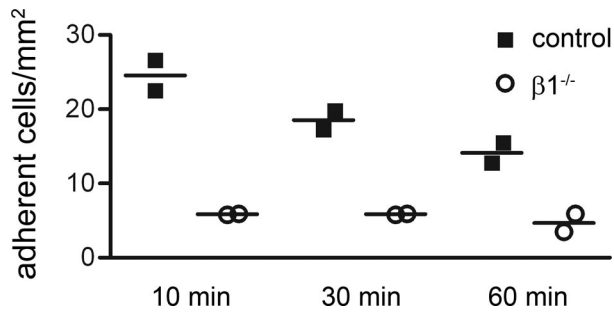

**Fig. S3.** In vivo firm adhesion of  $\beta_1^{-/-}$  T lymphocytes to the spinal cord microvasculature is dramatically reduced. Proliferating CD4<sup>+</sup> 2D2 transgenic control and  $\beta_1^{-/-}$  T lymphocytes were analyzed for their adhesive behavior in vivo. Firm adhesion of control and  $\beta_1^{-/-}$  T cell blasts to the spinal cord microvascular wall was analyzed by intravital microscopy 10 min, 30 min and 1 h after infusion. Each dot represents the mean of one experiment, lines indicate the medians ( $n = 2$ ).

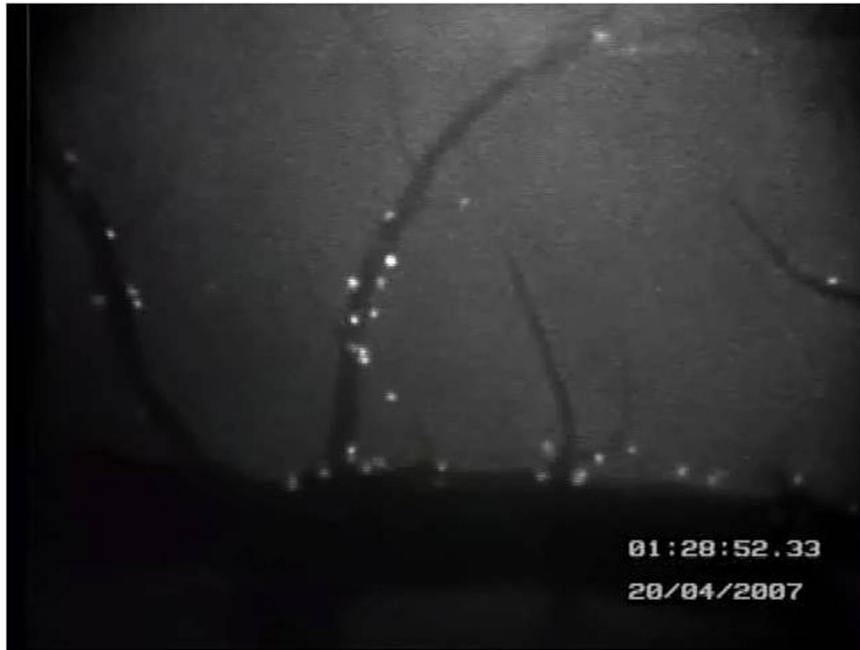

**Movie S1.** In vivo adhesion of control T cells to the spinal cord microvasculature. Proliferating CD4<sup>+</sup> OT-II.2 transgenic control T lymphocytes were analyzed for their adhesive behavior in vivo. The interaction of T cell blasts with endothelial cells was observed by intravital microscopy of the spinal cord white matter microvasculature in WT mice with ongoing active EAE. Movie shows first the injection of the Calcein-AM-labeled lymphocytes into the microvasculature of anesthetized mice. Adherent T cells 10 min and 1 h after infusion are shown.

[Movie S1 \(MOV\)](#)

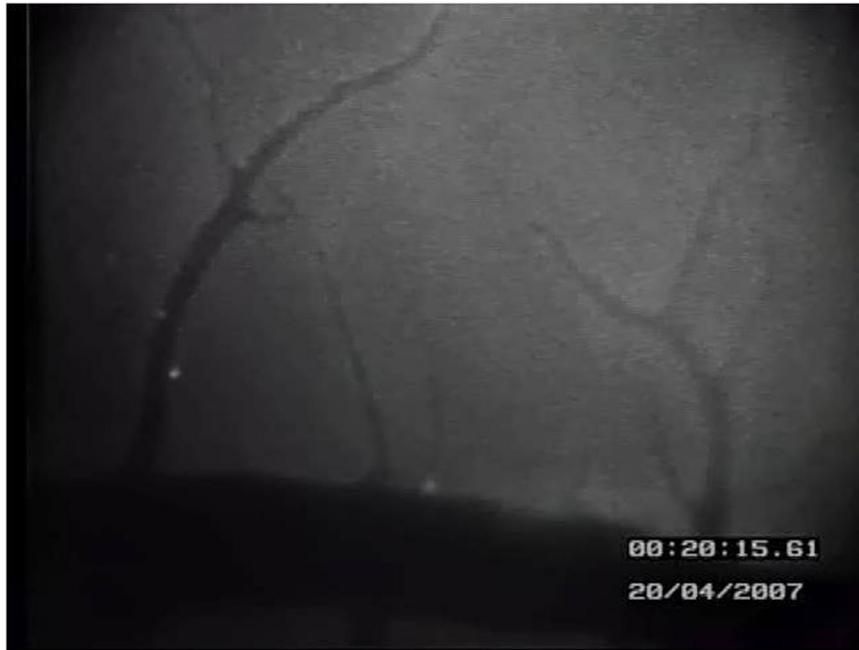

**Movie S2.** In vivo adhesion of  $\beta_1^{-/-}$  T cells to the spinal cord microvasculature. Proliferating  $CD4^+$  OT-II.2 transgenic  $\beta_1^{-/-}$  T lymphocytes were analyzed for their adhesive behavior in vivo. The interaction of T cell blasts with endothelial cells was observed by intravital microscopy of the spinal cord white matter microvasculature in WT mice with ongoing active EAE. Movie shows first the injection of the Calcein-AM-labeled lymphocytes into the microvasculature of anesthetized mice. Adherent T cells 10 min and 1 h after infusion are shown. Both movies show the vasculature of the same mouse, into which first  $\beta_1^{-/-}$  and then control T cells were injected.

[Movie S2 \(MOV\)](#)

**Table S1. Antibodies, specifying label, clone, and distributor**

| Antigen             | Label  | Clone         | Company       |
|---------------------|--------|---------------|---------------|
| CD28                | None   | 37.51         | BD Pharmingen |
| CD3e                | None   | 145-2C11      | BD Pharmingen |
| CD4                 | FITC   | H129.19       | BD Pharmingen |
| CD4                 | PE     | H129.19       | BD Pharmingen |
| CD4                 | Biotin | H129.19       | BD Pharmingen |
| CD8                 | Biotin | 53-6.7        | BD Pharmingen |
| Gr-1                | PE     | RB6-8C5       | BD Pharmingen |
| Hamster IgG         | PE     | HTK888        | BioLegend     |
| Hamster IgM         | FITC   | G235-1        | BD Pharmingen |
| IFN- $\gamma$       | PE     | XMG1.2        | BD Pharmingen |
| IL-17               | PE     | TC11-18H10.1  | BD Pharmingen |
| IL-2                | PE     | JES6-5H4      | BD Pharmingen |
| IL-4                | PE     | 11B11         | BD Pharmingen |
| Integrin $\alpha_4$ | Biotin | 9C10          | BD Pharmingen |
| Integrin $\alpha_5$ | Biotin | 5H10-27       | BD Pharmingen |
| Integrin $\alpha_6$ | PE     | GoH3          | BD Pharmingen |
| Integrin $\alpha_E$ | PE     | M290          | BD Pharmingen |
| Integrin $\alpha_L$ | Biotin | M17/4         | eBioscience   |
| Integrin $\alpha_V$ | PE     | RMV-7         | BD Pharmingen |
| Integrin $\beta_1$  | Biotin | Ha2/5         | BD Pharmingen |
| Integrin $\beta_1$  | FITC   | Ha2/5         | BD Pharmingen |
| Integrin $\beta_1$  | PE     | HMBeta1—1     | BioLegend     |
| Integrin $\beta_2$  | Biotin | C71/16        | BD Pharmingen |
| Integrin $\beta_7$  | PE     | M293          | BD Pharmingen |
| Ly5.1               | Biotin | A20           | BD Pharmingen |
| Mac-1               | Biotin | M1/70         | BD Pharmingen |
| Mac-1               | Biotin | M1/70         | BD Pharmingen |
| Pan-laminin         | None   | L9393         | Sigma         |
| Rat IgG1            | PE     | R3-34         | BD Pharmingen |
| Rat IgG2a, $\kappa$ | PE     | R35-95        | BD Pharmingen |
| Rat IgG2a, $\kappa$ | Biotin | Not available | eBioscience   |
| Rat IgG2b           | PE     | eB149/10H5    | eBioscience   |
| TNF- $\alpha$       | PE     | MP6-XT22      | BD Pharmingen |
| V $\alpha$ 2 TCR    | Biotin | B20.1         | eBioscience   |

PE, phycoerythrin.
